# Supplementary material
Source: PubMed Central journal article supplement (PMC3745332)
Supplement: supp_M113.480517_jbc.M113.480517-1.pdf [file supp_M113.480517_jbc.M113.480517-1.pdf]

## Supplemental Information

**Supplemental Table 1. Primers used in qRT-PCR analyses.**

| Gene           | Forward (5' to 3')      | Reverse (5' to 3')     |
|----------------|-------------------------|------------------------|
| <i>ARRB1</i>   | ggttcagtatgccccagaga    | cgctctgttggtgtgtgg     |
| <i>CBX5</i>    | atcgctcggggccttgagag    | tgcaagaaccaggctcagctc  |
| <i>CEACAM5</i> | agattgcagtgagcccagat    | ctgcttcactctggtggaca   |
| <i>CYP1A1</i>  | catccccacagcacaacaag    | caggggtgagaaaccgtcag   |
| <i>CYP1B1</i>  | ctggattggagaacgtaccg    | tgatccaattctgctgcact   |
| <i>DHRS3</i>   | gacgctttggatgtgcagta    | atgatgatgcctcctcaag    |
| <i>GCNT1</i>   | cgcacacatttcaacaacc     | gcagtctgggaaagactgagg  |
| <i>HPRT</i>    | cctcaggcgaacctctcggct   | cagggctgcgggtcgcata    |
| <i>PPARG</i>   | ttcagaatgccttgcaagt     | ccaacagcttctcctctcg    |
| <i>RERG</i>    | acctaccgacaccaagcaac    | cetcaaaacttctcgggta    |
| <i>RGS16</i>   | caagacacgtctggggatct    | caggtegaacgactctctcc   |
| <i>SNAI2</i>   | tgccttgcttctcgttct      | ttgtttgtggtgcagtgg     |
| <i>TGBF2</i>   | gcatttctcactccgaagc     | tgaattccatgctcttcag    |
| <i>CLDN6</i>   | cccttctccttcgcagtg      | atgctgttcccgatgaaag    |
| <i>DNMT1</i>   | gaccatcaggcattctacc     | ttacattcccacactcagg    |
| <i>FKBP4</i>   | gggctcaaggatactcacac    | ccaagctgagagtcggtc     |
| <i>GSTP1</i>   | caaatacatctcctcatctacac | ttgcctccctggtctgg      |
| <i>KIF1A</i>   | ccaagctgagagtctggc      | accagaccgatgtaactgc    |
| <i>MAL</i>     | ttttacctcaggcctcagt     | acaccatctgggtttcagc    |
| <i>PHD3</i>    | gggcaatactactgcaaggag   | agtcttcagtgagggcagattc |
| <i>P16</i>     | gcgatgtcgcacggtacctg    | gggcagttgtggcctgtag    |
| <i>TFPI-2</i>  | gggcctacttctccgttac     | cacactggctgcccacactc   |
| <i>VGF</i>     | acccgagtgaatctggagag    | gacactcctccccgaactt    |

**Supplemental Table 2. Effect of anthraquinone compounds on Dnmt1 activity.** The observed initial velocity in the presence of 10  $\mu\text{M}$  compound. Assays included 10 nM oligonucleotide 8006, 10  $\mu\text{M}$  AdoMet and 2 nM Dnmt1 (621-1600). None of these anthraquinones (ChemBridge Corp., San Diego, CA) had an effect on Dnmt1 activity.

| Compound                                                                                      | Initial Velocity (RFU/min) |
|-----------------------------------------------------------------------------------------------|----------------------------|
| DMSO Control                                                                                  | $47 \pm 4$                 |
| 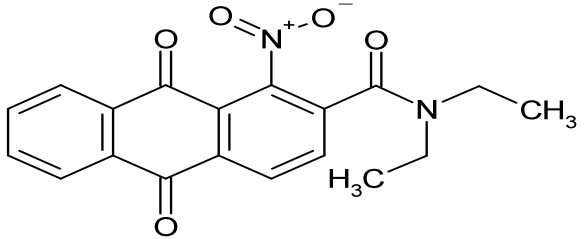<br>UI1055   | $48 \pm 6$                 |
| <br>UI1060  | $48 \pm 5$                 |
| <br>UI1061 | $50 \pm 5$                 |

**Supplemental Table 3. Changes in gene expression caused by laccaic acid A in MCF-7 cells.**

| Gene Symbol     | RefSeq          | Fold Change | p-value |
|-----------------|-----------------|-------------|---------|
| <i>CYP1A1</i>   | AM233518        | 13.47       | 3.4E-05 |
| <i>RGS16</i>    | AF493937        | 4.86        | 3.2E-04 |
| <i>UGT2B1</i>   | --              | 4.59        | 5.2E-04 |
| <i>TARP</i>     | --              | 4.57        | 1.4E-04 |
| <i>HEY2</i>     | AB044755        | 4.34        | 1.6E-03 |
| <i>BMPR1B</i>   | AK299930        | 4.16        | 1.3E-04 |
| <i>CEACAM6</i>  | BT009774        | 4.07        | 5.3E-03 |
| <i>FAM105A</i>  | --              | 3.96        | 2.3E-05 |
| <i>CEACAM5</i>  | BC034671        | 3.24        | 1.2E-03 |
| <i>MICAL2</i>   | AB110785        | 3.22        | 5.8E-05 |
| <i>NECAB1</i>   | BC016340        | 3.18        | 4.9E-04 |
| <i>UGT2B15</i>  | AK289419        | 2.98        | 1.7E-03 |
| <i>PPFIA2</i>   | AF034799        | 2.79        | 1.5E-03 |
| <i>PMP22</i>    | --              | 2.59        | 8.9E-04 |
| <i>DHRS3</i>    | ENST00000376223 | 2.42        | 7.8E-04 |
| <i>ELOVL3</i>   | BC034344        | 2.37        | 8.8E-04 |
| <i>GCNT1</i>    | AJ420416        | 2.33        | 3.0E-04 |
| <i>LAMA3</i>    | AK096422        | 2.33        | 5.6E-04 |
| <i>CIQTNF9B</i> | BC110413        | 2.32        | 4.2E-03 |
| <i>RERG</i>     | AF339750        | 2.30        | 5.0E-03 |
| <i>ARRB1</i>    | AF084040        | 2.29        | 4.9E-05 |
| <i>PPARG</i>    | ENST00000397010 | 2.28        | 6.5E-03 |
| <i>NPY1R</i>    | AK296624        | 2.28        | 1.5E-02 |
| <i>CYP1B1</i>   | AK303862        | 2.26        | 1.9E-05 |
| <i>SELL</i>     | AK298705        | 2.25        | 7.8E-05 |
| <i>FAM46C</i>   | BC036516        | 2.25        | 9.4E-04 |
| <i>BPIFB1</i>   | AF364078        | 2.23        | 2.5E-03 |
| <i>WLS</i>      | AB097018        | 2.23        | 3.5E-03 |
| <i>LMO3</i>     | AB044745        | 2.22        | 4.2E-04 |
| <i>ALDH1A3</i>  | BC069274        | 2.16        | 6.8E-03 |
| <i>TSPAN2</i>   | GU971730        | 2.16        | 1.1E-03 |
| <i>TNFSF10</i>  | AK296085        | 2.06        | 6.2E-04 |
| <i>MBOAT1</i>   | AK296857        | 2.05        | 2.4E-04 |
| <i>GLDN</i>     | AY358144        | 2.02        | 2.0E-03 |
| <i>LMCD1</i>    | AF216709        | 2.01        | 2.7E-03 |
| <i>SGMS2</i>    | AK290344        | -2.01       | 1.8E-05 |
| <i>CACNG4</i>   | AF162692        | -2.04       | 1.5E-03 |
| <i>NT5E</i>     | BC065937        | -2.04       | 1.4E-03 |
| <i>CRISP3</i>   | AK292786        | -2.04       | 2.9E-03 |
| <i>ABCA12</i>   | AF418105        | -2.05       | 2.9E-04 |
| <i>MAP3K1</i>   | --              | -2.05       | 1.9E-05 |
| <i>B3GNT5</i>   | AB045278        | -2.11       | 7.3E-04 |
| <i>ITGB6</i>    | AK290300        | -2.11       | 1.7E-03 |
| <i>TGM2</i>     | S81734          | -2.16       | 5.9E-03 |

|                 |                 |       |         |
|-----------------|-----------------|-------|---------|
| <i>EFEMP1</i>   | AK290599        | -2.18 | 6.3E-04 |
| <i>DIO2</i>     | AB041843        | -2.21 | 1.5E-02 |
| <i>ST3GAL5</i>  | AB018356        | -2.35 | 1.9E-03 |
| <i>MALL</i>     | BC003179        | -2.36 | 1.4E-03 |
| <i>KIAA1324</i> | AK297221        | -2.39 | 9.9E-05 |
| <i>ID3</i>      | AK290003        | -2.47 | 8.0E-05 |
| <i>PCSK2</i>    | AK294200        | -2.49 | 1.6E-03 |
| <i>CAVI</i>     | AK290871        | -2.54 | 2.2E-03 |
| <i>MME</i>      | AK291761        | -2.60 | 2.2E-04 |
| <i>KRT80</i>    | BC065180        | -2.62 | 4.8E-04 |
| <i>IFI27</i>    | AK289535        | -2.62 | 5.7E-03 |
| <i>EDN1</i>     | AK291838        | -2.65 | 1.4E-03 |
| <i>MGP</i>      | ENST00000539261 | -2.81 | 3.1E-03 |
| <i>CLDN1</i>    | AF086514        | -2.81 | 2.7E-03 |
| <i>ANXA1</i>    | BC001275        | -2.88 | 4.5E-03 |
| <i>SNAI2</i>    | BC014890        | -3.27 | 2.6E-04 |
| <i>SERPINA3</i> | --              | -3.76 | 4.1E-04 |
| <i>ID1</i>      | AK291152        | -4.33 | 1.9E-04 |
| <i>ID2</i>      | AY634687        | -4.57 | 9.6E-05 |
| <i>TGFB2</i>    | AK295671        | -6.10 | 4.6E-05 |

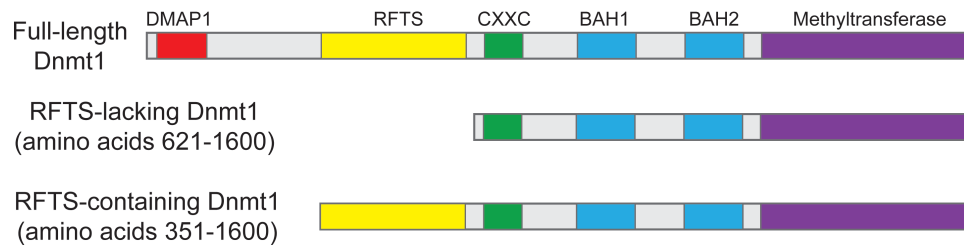

**Figure S1. Domain structure of full-length and truncated Dnmt1 proteins.** Full-length Dnmt1 consists of a large N-terminal regulatory region (~1100 amino acids) that is comprised of several small globular domains and a C-terminal catalytic methyltransferase domain. Both RFTS-lacking and RFTS-containing Dnmt1 are used in *in vitro* experiments to investigate inhibition of Dnmt1.

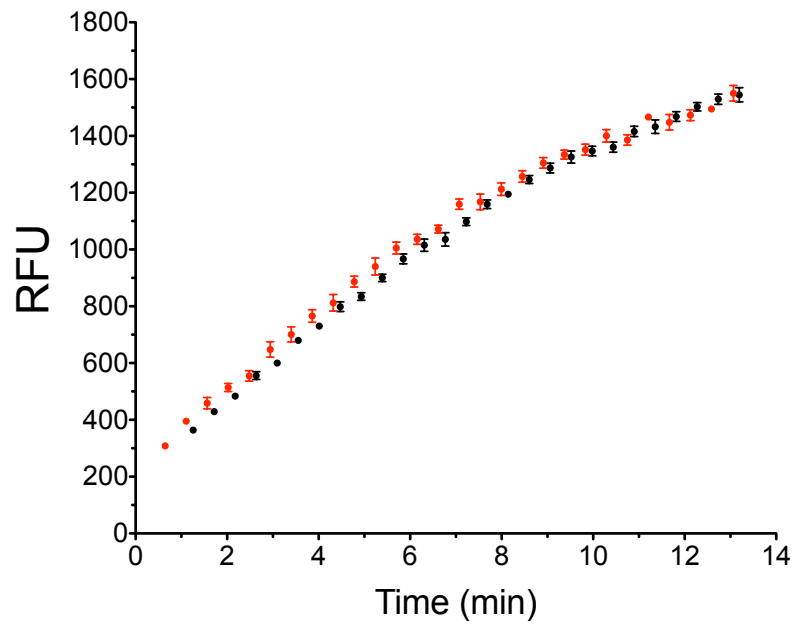

**Figure S2. Effect of LCA on Gla I activity.** Gla I activity was measured using an internally quenched hairpin DNA with a fully methylated GCGC site (the cleavage site of Gla I). Gla I cleavage of the oligonucleotide releases the 5' fluorophore from the 3' quencher, generating fluorescence in real-time. The time-dependent cleavage of 8 nM oligonucleotide substrate with 0.4 U of enzyme in the presence of 0 LCA (black) or 10 μM LCA (red). Addition of LCA has no effect on the activity of Gla I.

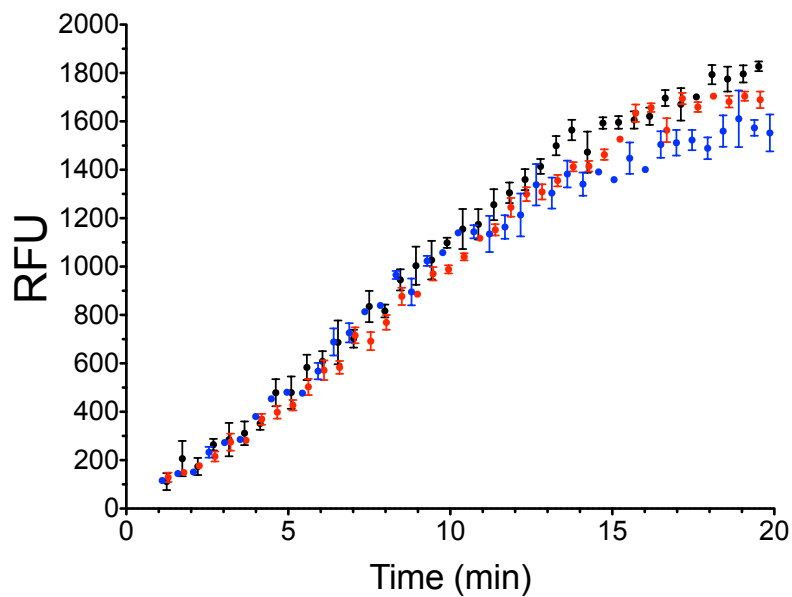

**Figure S3. Effect of control anthraquinones on Dnmt1 activity.** Dnmt1 activity was measured using the Glu I-coupled DNA methylation assay. Assays containing 20 nM oligonucleotide 8006, 10  $\mu$ M AdoMet, and 50  $\mu$ M anthraquinone were conducted using 2 nM Dnmt1 (621-1600). Addition of anthraquinone (red) or anthraquinone 2-carboxylic acid (blue) had no effect on the observed activity of Dnmt1. The DMSO control assay is shown in black.

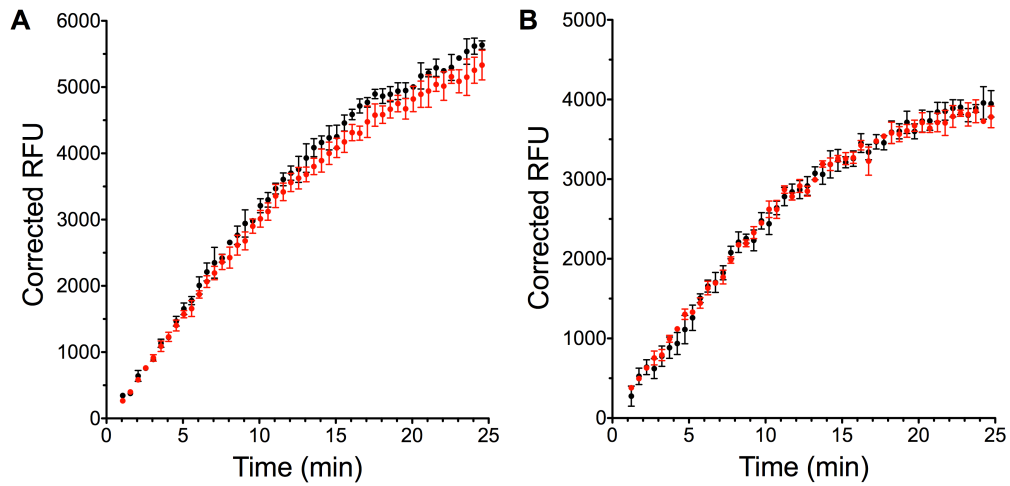

**Figure S4. Effect of LCA pre-incubation on Dnmt1 activity.** 5  $\mu$ M LCA was incubated with either Dnmt1 (0.5  $\mu$ M) or Dnmt1 and AdoMet (0.5  $\mu$ M and 50  $\mu$ M respectively) for 30 minutes. Enzyme was then buffer exchanged into assay buffer lacking LCA and DNA substrate and used to initiate DNA methylation assays. Assays containing 20 nM oligonucleotide 8006 and 20  $\mu$ M AdoMet were conducted using 1.5 nM (A) or 1 nM (B) buffer exchanged Dnmt1 (621-1600). Panel A shows Dnmt1 incubated with LCA, while panel B shows Dnmt1 and SAM incubated LCA. In both cases, incubation with LCA (red) had no effect on the observed activity of Dnmt1. The DMSO control assay is shown in black.



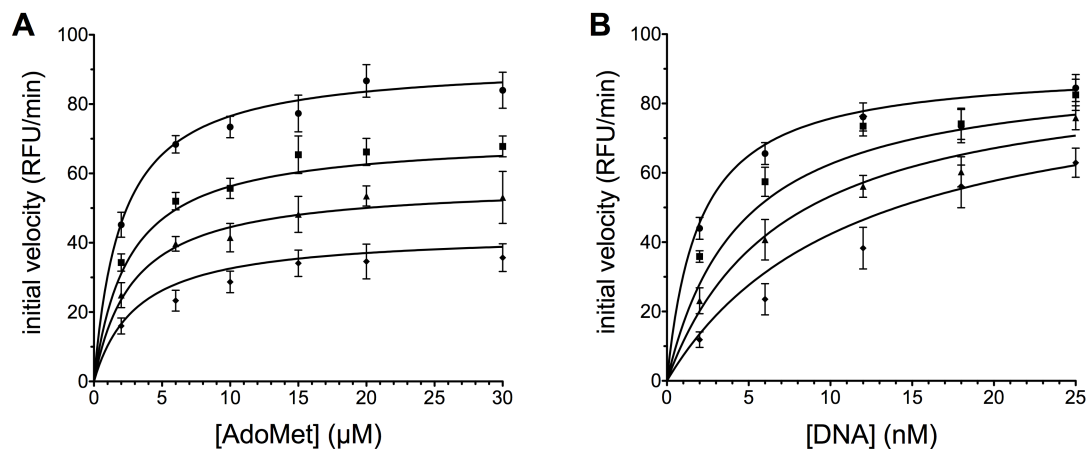

**Figure S5. Mode of inhibition of LCA.** A) AdoMet-dependent LCA inhibition kinetics. LCA was used as an inhibitor in reactions containing 20 nM DNA and varying concentrations of AdoMet (2-30  $\mu\text{M}$ ). Initial velocities  $\pm$  SEM are shown for no LCA ( $\bullet$ ), 0.4  $\mu\text{M}$  LCA ( $\blacksquare$ ), 0.8  $\mu\text{M}$  LCA ( $\blacktriangle$ ) and 1.5  $\mu\text{M}$  LCA ( $\blacklozenge$ ). The same data are shown as a double reciprocal plot in Fig 4B. LCA exhibits mixed inhibition with respect to AdoMet, indicating that LCA binds both the free enzyme and the enzyme•SAM complex. The data were fit to the mixed model inhibition expression in Prism giving a  $K_{m,AdoMet}$  of  $2.0 \pm 0.2 \mu\text{M}$ ,  $K_{i,a}$  of  $640 \pm 200 \text{ nM}$ ,  $K_{i,b}$  of  $1.4 \pm 0.4 \mu\text{M}$  and  $V_{\max}$  of  $92 \pm 2 \text{ RFU/min}$ . B) DNA-dependent LCA inhibition kinetics. LCA was used as an inhibitor in reactions containing 30  $\mu\text{M}$  AdoMet and varying concentrations of DNA (2-25 nM). Initial velocities  $\pm$  SEM are shown for no LCA ( $\bullet$ ), 0.4  $\mu\text{M}$  LCA ( $\blacksquare$ ), 0.8  $\mu\text{M}$  LCA ( $\blacktriangle$ ) and 1.5  $\mu\text{M}$  LCA ( $\blacklozenge$ ). The same data are shown as a double reciprocal plot in Fig 4C and indicates LCA is competitive with DNA substrate. Globally fitting these data to the competitive inhibition equation in Prism gives a  $K_{m,DNA}$  of  $1.9 \pm 0.4 \text{ nM}$ ,  $K_i$  of  $310 \pm 80 \text{ nM}$  and  $V_{\max}$  of  $91 \pm 4 \text{ RFU/min}$ .
